# Supplementary material for: The Dutch real-time gauge-adjusted radar precipitation product
Source: Copernicus journal article supplement (doi:10.5194/essd-17-4715-2025), 2025-09-25
Supplement: Supplementary file [file essd-17-4715-2025-supplement-title-page.pdf › essd-17-4715-2025-supplement-title-page.pdf]

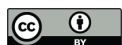

*Supplement of*

## **The Dutch real-time gauge-adjusted radar precipitation product**

**Aart Overeem et al.**

*Correspondence to:* Aart Overeem (overeem@knmi.nl)

- [essd-17-4715-2025-supplement-title-page.pdf](#)
- [Movie S1.gif](#)

The copyright of individual parts of the supplement might differ from the article licence.
